# Supplementary material
Source: PubMed Central journal article supplement (PMC7044030)

**Supplemental Figure 1.** *Mean Absolute Percent Error for unedited commercial activity monitor relative to unedited Actiwatch total sleep time and wake after sleep onset.*

Panel A: total sleep time; panel B: wake after sleep onset. Data are shown as mean±standard deviation. Abbreviations: SD=standard deviation; TST=total sleep time; WASO=wake after sleep onset.

**Supplemental Figure 2.** *Bland-Altman plots for unedited commercial activity monitor vs. unedited Actiwatch total sleep time.*

Data are shown in minutes. X-axis indicates the mean total sleep time of the commercial activity monitor and Actiwatch (CAM & AW). Y-axis indicates the difference in total sleep time between the commercial activity monitor and actiwatch (CAM-AW). Closed circles=good sleepers (i.e., Pittsburgh Sleep Quality Index [PSQI] global score  $\leq 5$ ); open circles=poor sleepers (i.e., PSQI global score  $> 5$ ). Abbreviations: AW=Actiwatch; CAM=commercial activity monitor; TST=total sleep time.

**Supplemental Figure 3.** *Bland-Altman plots for unedited commercial activity monitor vs. unedited Actiwatch wake after sleep onset.*

Data are shown in minutes. X-axis indicates the mean wake after sleep onset of the commercial activity monitor and Actiwatch (CAM & AW). Y-axis indicates the difference in wake after sleep onset between the commercial activity monitor and actiwatch (CAM-AW). Closed circles=good sleepers (i.e., Pittsburgh Sleep Quality Index [PSQI] global score  $\leq 5$ ); open circles=poor sleepers (i.e., PSQI global score  $> 5$ ). Abbreviations: AW=Actiwatch; CAM=commercial activity monitor; WASO=wake after sleep onset.

**Supplemental Table 1.** Overall and sex-stratified comparison of total sleep time between the unedited commercial activity monitor and edited Actiwatch.

| <b>CAM</b>        | <b>CAM TST</b> | <b>AW TST</b> | <b>Difference</b> | <b>P-value</b> | <b>ICC (95% CI)</b> |
|-------------------|----------------|---------------|-------------------|----------------|---------------------|
| Fitbit Alta       |                |               |                   |                |                     |
| Overall           | 466.4 (146.7)  | 410.1 (97.4)  | 56.4 (80.9)       | .001           | .84 (.51-.93)       |
| Females           | 476.5 (113.5)  | 428.9 (71.3)  | 47.6 (14.6)       | .02            | .86 (.47-.96)       |
| Males             | 456.4 (177.4)  | 391.3 (117.5) | 65.1 (91.1)       | .02            | .79 (.30-.93)       |
| Jawbone Up3       |                |               |                   |                |                     |
| Overall           | 473.1 (137.6)  | 419.4 (75.2)  | 53.7 (107.4)      | .01            | .65 (.26-.83)       |
| Females           | 524.8 (111.8)  | 431.1 (81.6)  | 93.7 (67.0)       | <.001          | .69 (-.23-.92)      |
| Males             | 421.5 (145.0)  | 407.8 (68.9)  | 13.7 (126.3)      | .68            | .57 (-.35-.86)      |
| Misfit Shine 2    |                |               |                   |                |                     |
| Overall           | 434.2 (119.5)  | 363.4 (65.3)  | 70.8 (97.0)       | <.001          | .56 (.03-.80)       |
| Females           | 416.1 (136.6)  | 366.0 (81.4)  | 49.9 (101.9)      | .07            | .71 (.19-.90)       |
| Males             | 452.3 (101.1)  | 360.7 (46.7)  | 91.6 (90.3)       | .002           | .35 (-.31-.74)      |
| Polar A360        |                |               |                   |                |                     |
| Overall           | 305.1 (93.9)   | 386.9 (78.2)  | -81.8 (124.9)     | .001           | .00 (-.70-.40)      |
| Females           | 315.1 (106.5)  | 401.1 (83.9)  | -86.0 (40.8)      | .05            | .00 (-.99-.36)      |
| Males             | 295.2 (81.9)   | 372.7 (72.2)  | -77.5 (85.8)      | .004           | .41 (-.29-.78)      |
| Samsung Gear Fit2 |                |               |                   |                |                     |
| Overall           | 366.8 (68.1)   | 359.7 (61.2)  | 7.1 (34.9)        | .27            | .92 (.84-.96)       |
| Females           | 379.7 (65.8)   | 368.6 (65.7)  | 11.1 (10.2)       | .001           | .98 (.84-.99)       |
| Males             | 353.9 (70.1)   | 350.8 (57.1)  | 3.1 (48.9)        | .81            | .84 (.51-.95)       |
| Xiaomi Mi Band 2  |                |               |                   |                |                     |
| Overall           | 474.8 (119.5)  | 394.3 (76.2)  | 80.5 (86.4)       | <.001          | .65 (-.01-.86)      |
| Females           | 527.8 (106.9)  | 443.3 (68.3)  | 84.5 (82.2)       | .001           | .58 (-.20-.86)      |
| Males             | 421.8 (110.0)  | 345.2 (46.8)  | 76.6 (24.1)       | .007           | .45 (-.27-.79)      |

Analyses for the overall sample are based on 30 participants for each CAM; n=15 for females and n=15 for males. AW: Actiwatch; CAM: commercial activity monitor; CI: confidence interval; ICC: intra-class correlation; TST: total sleep time in minutes. CAM TST, AW TST, and Difference data are reported as mean (standard deviation).

**Supplemental Table 2.** Overall and sex-stratified comparison of wake after sleep onset between the unedited commercial activity monitor and edited Actiwatch.

| <b>CAM</b>        | <b>CAM WASO</b> | <b>AW WASO</b> | <b>Difference</b> | <b>P-value</b> | <b>ICC (95% CI)</b> |
|-------------------|-----------------|----------------|-------------------|----------------|---------------------|
| Fitbit Alta       |                 |                |                   |                |                     |
| <i>Overall</i>    | 31.4 (22.9)     | 46.4 (32.9)    | -14.9 (26.5)      | .004           | .67 (.26-.85)       |
| <i>Females</i>    | 29.1 (27.4)     | 38.1 (22.6)    | -9.0 (14.6)       | .03            | .88 (.60-.96)       |
| <i>Males</i>      | 33.7 (17.9)     | 54.7 (39.7)    | -21 (34.2)        | .03            | .49 (-.11-.69)      |
| Jawbone Up3       |                 |                |                   |                |                     |
| <i>Overall</i>    | 60.1 (50.1)     | 53.3 (35.6)    | 6.8 (43.6)        | .40            | .67 (.30-.84)       |
| <i>Females</i>    | 33.7 (17.9)     | 54.7 (39.7)    | -21 (34.2)        | .03            | .49 (-.11-.69)      |
| <i>Males</i>      | 74.1 (64.0)     | 69.5 (40.7)    | 4.6 (56.0)        | .75            | .64 (-.12-.88)      |
| Misfit Shine 2    |                 |                |                   |                |                     |
| <i>Overall</i>    | 13.8 (17.9)     | 37.8 (24.6)    | -24.1 (24.1)      | < .001         | .38 (-.19-.70)      |
| <i>Females</i>    | 14.2 (16.5)     | 33.2 (25.5)    | -19.0 (26.4)      | .02            | .31 (-.45-.73)      |
| <i>Males</i>      | 13.3 (19.7)     | 42.5 (23.7)    | -29.2 (21.2)      | .002           | .44 (-.27-.80)      |
| Polar A360        |                 |                |                   |                |                     |
| <i>Overall</i>    | 69.7 (32.8)     | 42.0 (28.4)    | 27.7 (32.5)       | < .001         | .48 (-.10-.76)      |
| <i>Females</i>    | 61.7 (29.9)     | 38.5 (28.3)    | 23.2 (25.2)       | .003           | .65 (-.10-.89)      |
| <i>Males</i>      | 77.7 (34.5)     | 45.5 (29.1)    | 32.2 (38.9)       | .006           | .30 (-.39-.72)      |
| Samsung Gear Fit2 |                 |                |                   |                |                     |
| <i>Overall</i>    | 21.0 (15.5)     | 36.9 (23.6)    | -15.9 (15.8)      | < .001         | .69 (-.03-.88)      |
| <i>Females</i>    | 17.2 (15.9)     | 29.9 (24.0)    | -12.9 (12.9)      | .002           | .81 (.1-.95)        |
| <i>Males</i>      | 24.8 (14.6)     | 44.0 (21.8)    | -19.2 (18.0)      | .001           | .52 (-.24-.83)      |
| Xiaomi Mi Band 2  |                 |                |                   |                |                     |
| <i>Overall</i>    | 15.6 (28.1)     | 43.5 (28.8)    | -27.9 (28.3)      | < .001         | .51 (-.14-.79)      |
| <i>Females</i>    | 7.2 (12.3)      | 41.3 (26.5)    | -34.1 (28.3)      | < .001         | .10 (-.34-.50)      |
| <i>Males</i>      | 24.0 (36.5)     | 45.7 (31.6)    | -21.7 (27.8)      | .009           | .72 (.10-.91)       |

Analyses for the overall sample are based on 30 participants for each CAM; n=15 for females and n=15 for males. AW: Actiwatch; CAM: commercial activity monitor; CI: confidence interval; ICC: intra-class correlation; WASO: wake after sleep onset in minutes. CAM TST, AW TST, and Difference data are reported as mean (standard deviation).

**Supplemental Table 3.** Overall and sleep quality-stratified comparison of total sleep time between the unedited commercial activity monitor and unedited Actiwatch.

| CAM               | CAM TST       | AW TST        | Difference    | P-value | ICC (95% CI)   |
|-------------------|---------------|---------------|---------------|---------|----------------|
| Fitbit Alta       |               |               |               |         |                |
| Overall           | 466.4 (146.7) | 414.6 (100.5) | 51.9 (85.7)   | < .01   | .83 (.56-.93)  |
| PSQI ≤ 5          | 491.4 (165.7) | 416.9 (108.8) | 74.5 (90.6)   | .002    | .82 (.32-.94)  |
| PSQI > 5          | 416.7 (84.9)  | 410.0 (86.6)  | 6.7 (53.9)    | .70     | .89 (.59-.98)  |
| Jawbone Up3       |               |               |               |         |                |
| Overall           | 473.1 (137.6) | 418.4 (84.4)  | 54.7 (89.1)   | < .01   | .77 (.43-.90)  |
| PSQI ≤ 5          | 484.8 (139.3) | 423.1 (84.1)  | 61.7 (96.5)   | .01     | .73 (.26-.90)  |
| PSQI > 5          | 449.7 (138.3) | 409.0 (88.7)  | 40.7 (74.8)   | .12     | .86 (.78-.97)  |
| Misfit Shine 2    |               |               |               |         |                |
| Overall           | 434.2 (119.5) | 370.3 (73.7)  | 63.9 (88.0)   | < .001  | .67 (.18-.88)  |
| PSQI ≤ 5          | 424.3 (124.6) | 355.2 (76.5)  | 69.1 (92.6)   | .003    | .66 (.10-.87)  |
| PSQI > 5          | 453.9 (112.2) | 400.5 (60.1)  | 53.4 (81.5)   | .07     | .68 (-.10-.91) |
| Polar A360        |               |               |               |         |                |
| Overall           | 305.1 (93.9)  | 393.5 (81.9)  | -88.4 (119.8) | < .001  | .10 (-.42-.49) |
| PSQI ≤ 5          | 300.1 (80.5)  | 391.7 (84.4)  | -91.6 (122.0) | .003    | .00 (-.86-.43) |
| PSQI > 5          | 315.2 (120.7) | 397.0 (80.9)  | -81.8 (121.4) | .06     | .39 (-.62-.83) |
| Samsung Gear Fit2 |               |               |               |         |                |
| Overall           | 366.8 (68.1)  | 359.0 (61.4)  | 7.8 (34.9)    | .23     | .92 (.84-.96)  |
| PSQI ≤ 5          | 371.4 (74.4)  | 367.9 (64.1)  | 3.5 (41.6)    | .71     | .90 (.76-.96)  |
| PSQI > 5          | 357.6 (55.7)  | 341.1 (54.0)  | 16.5 (12.3)   | .002    | .96 (.40-.99)  |
| Xiaomi Mi Band 2  |               |               |               |         |                |
| Overall           | 474.8 (119.5) | 396.3 (76.1)  | 78.5 (86.7)   | < .001  | .65 (.01-.86)  |
| PSQI ≤ 5          | 489.3 (132.1) | 405.6 (76.7)  | 83.7 (95.5)   | .001    | .64 (-.03-.87) |
| PSQI > 5          | 445.7 (87.9)  | 377.8 (75.3)  | 67.9 (68.9)   | .01     | .66 (-.20-.91) |

Analyses for the overall sample are based on 30 participants for each CAM; n=20 for PSQI ≤ 5 and n=10 for PSQI > 5. AW: Actiwatch; CAM: commercial activity monitor; CI: confidence interval; ICC: intra-class correlation; PSQI: Pittsburgh Sleep Quality Index; TST: total sleep time in minutes. CAM TST, AW TST, and Difference data are reported as mean (standard deviation).

**Supplemental Table 4.** Overall and sleep quality-stratified comparison of wake after sleep onset between the unedited commercial activity monitor and unedited Actiwatch.

| <b>CAM</b>         | <b>CAM WASO</b> | <b>AW WASO</b> | <b>Difference</b> | <b>P-value</b> | <b>ICC (95% CI)</b> |
|--------------------|-----------------|----------------|-------------------|----------------|---------------------|
| Fitbit Alta        |                 |                |                   |                |                     |
| <i>Overall</i>     | 31.4 (22.9)     | 47.8 (32.1)    | -16.4 (26.8)      | < .01          | .63 (.19-83)        |
| <i>PSQI ≤ 5</i>    | 34.6 (25.8)     | 50.3 (30.8)    | -15.6 (28.3)      | .02            | .61 (.10-.85)       |
| <i>PSQI &gt; 5</i> | 25.0 (14.6)     | 42.8 (35.7)    | -17.8 (24.7)      | .05            | .66 (-.12-.91)      |
| Jawbone Up3        |                 |                |                   |                |                     |
| <i>Overall</i>     | 60.1 (50.1)     | 50.9 (30.1)    | 9.3 (37.1)        | .18            | .74 (.47-.88)       |
| <i>PSQI ≤ 5</i>    | 61.5 (56.9)     | 55.8 (29.7)    | 5.8 (41.2)        | .54            | .75 (.36-.90)       |
| <i>PSQI &gt; 5</i> | 57.3 (35.1)     | 41.1 (30.1)    | 16.2 (27.8)       | .10            | .74 (.10-.93)       |
| Misfit Shine 2     |                 |                |                   |                |                     |
| <i>Overall</i>     | 13.8 (17.9)     | 40.3 (25.1)    | -26.5 (21.2)      | < .001         | .47 (-.22-.78)      |
| <i>PSQI ≤ 5</i>    | 11.4 (14.6)     | 41.6 (24.9)    | -30.2 (21.4)      | <.001          | .36 (-.24-.72)      |
| <i>PSQI &gt; 5</i> | 18.5 (23.2)     | 37.7 (26.6)    | -19.2 (19.7)      | .01            | .71 (-.15-.93)      |
| Polar A360         |                 |                |                   |                |                     |
| <i>Overall</i>     | 69.7 (32.8)     | 42.5 (28.2)    | 27.3 (31.8)       | < .001         | .50 (-.09-.77)      |
| <i>PSQI ≤ 5</i>    | 73.9 (37.9)     | 46.6 (30.4)    | 27.4 (32.1)       | .001           | .60 (-.10-.85)      |
| <i>PSQI &gt; 5</i> | 61.3 (17.9)     | 34.2 (22.4)    | 27.1 (32.9)       | .03            | .00 (-.99-.52)      |
| Samsung Gear Fit2  |                 |                |                   |                |                     |
| <i>Overall</i>     | 21.0 (15.5)     | 36.2 (24.0)    | -15.2 (16.0)      | < .001         | .70 (.03-.89)       |
| <i>PSQI ≤ 5</i>    | 21.9 (15.9)     | 40.1 (26.3)    | -18.2 (17.0)      | < .001         | .68 (-.11-.89)      |
| <i>PSQI &gt; 5</i> | 19.1 (15.3)     | 28.3 (16.7)    | -9.2 (12.4)       | .04            | .76 (.08-.94)       |
| Xiaomi Mi Band 2   |                 |                |                   |                |                     |
| <i>Overall</i>     | 15.6 (28.1)     | 44.2 (28.7)    | -28.6 (28.7)      | < .001         | .49 (-.15-.78)      |
| <i>PSQI ≤ 5</i>    | 14.5 (20.6)     | 44.9 (24.1)    | -30.4 (34.5)      | .001           | .00 (-.89-.37)      |
| <i>PSQI &gt; 5</i> | 17.7 (40.4)     | 42.7 (37.7)    | -25.0 (10.7)      | < .001         | .89 (-.11-.98)      |

Analyses for the overall sample are based on 30 participants for each CAM; n=20 for PSQI ≤ 5 and n=10 for PSQI > 5. AW: Actiwatch; CAM: commercial activity monitor; CI: confidence interval; ICC: intra-class correlation; PSQI: Pittsburgh Sleep Quality Index; WASO: wake after sleep onset in minutes. CAM WASO, AW WASO, and Difference data are reported as mean (standard deviation).

**Supplemental Figure 1.** Mean Absolute Percent Error for unedited commercial activity monitor relative to unedited Actiwatch total sleep time and wake after sleep onset.

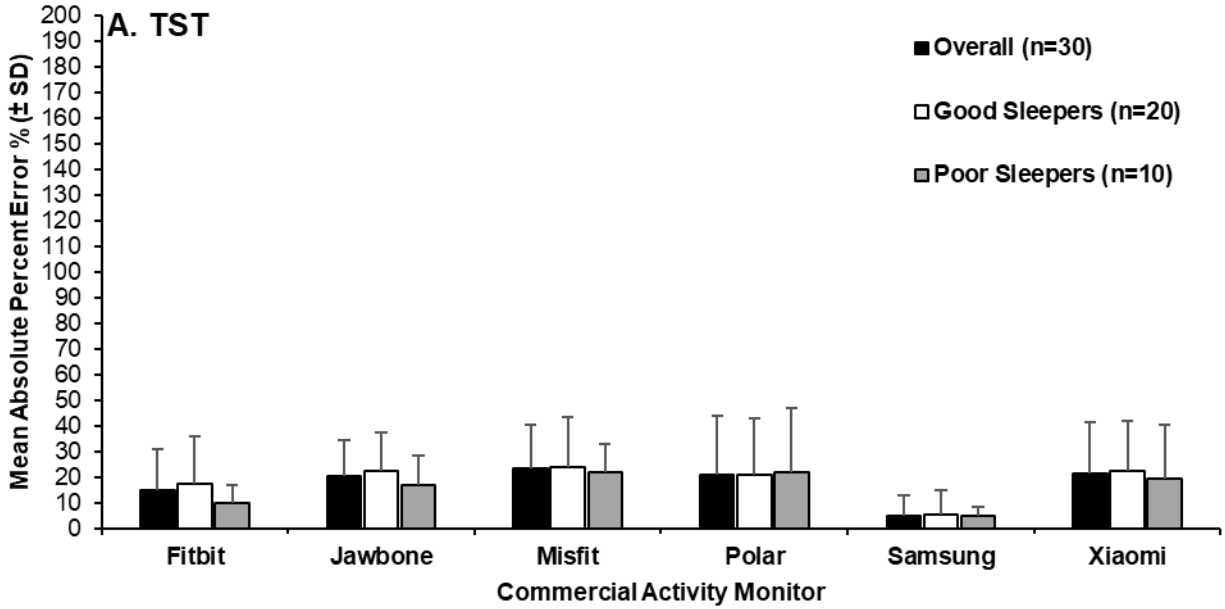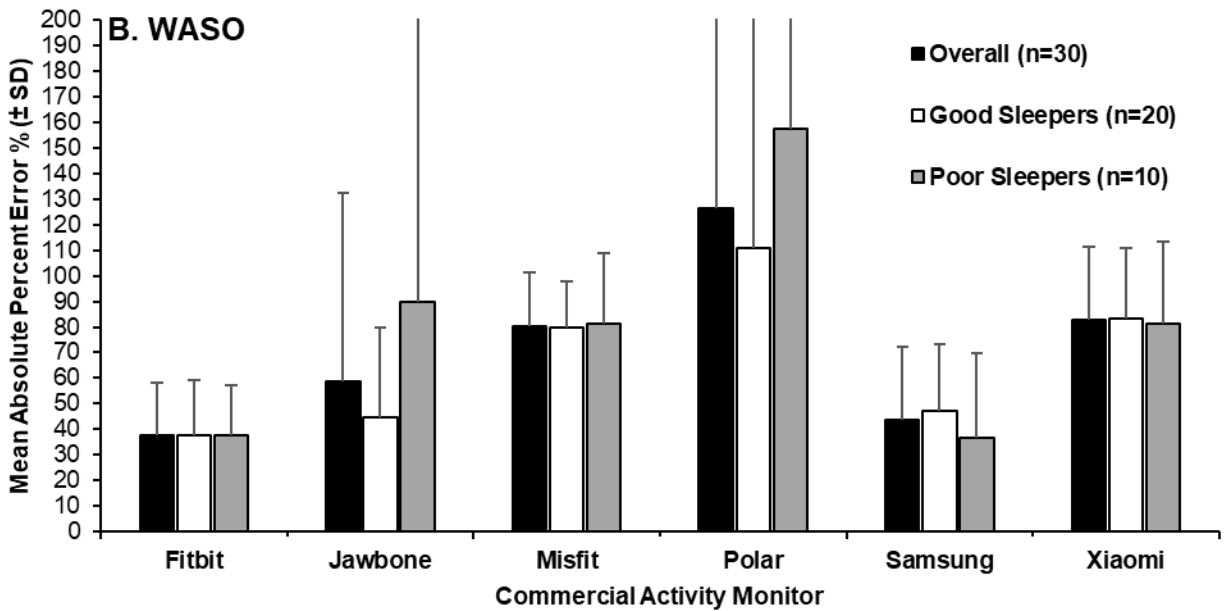

**Supplemental Figure 2.** Bland-Altman plots for unedited commercial activity monitor vs. unedited Actiwatch total sleep time.

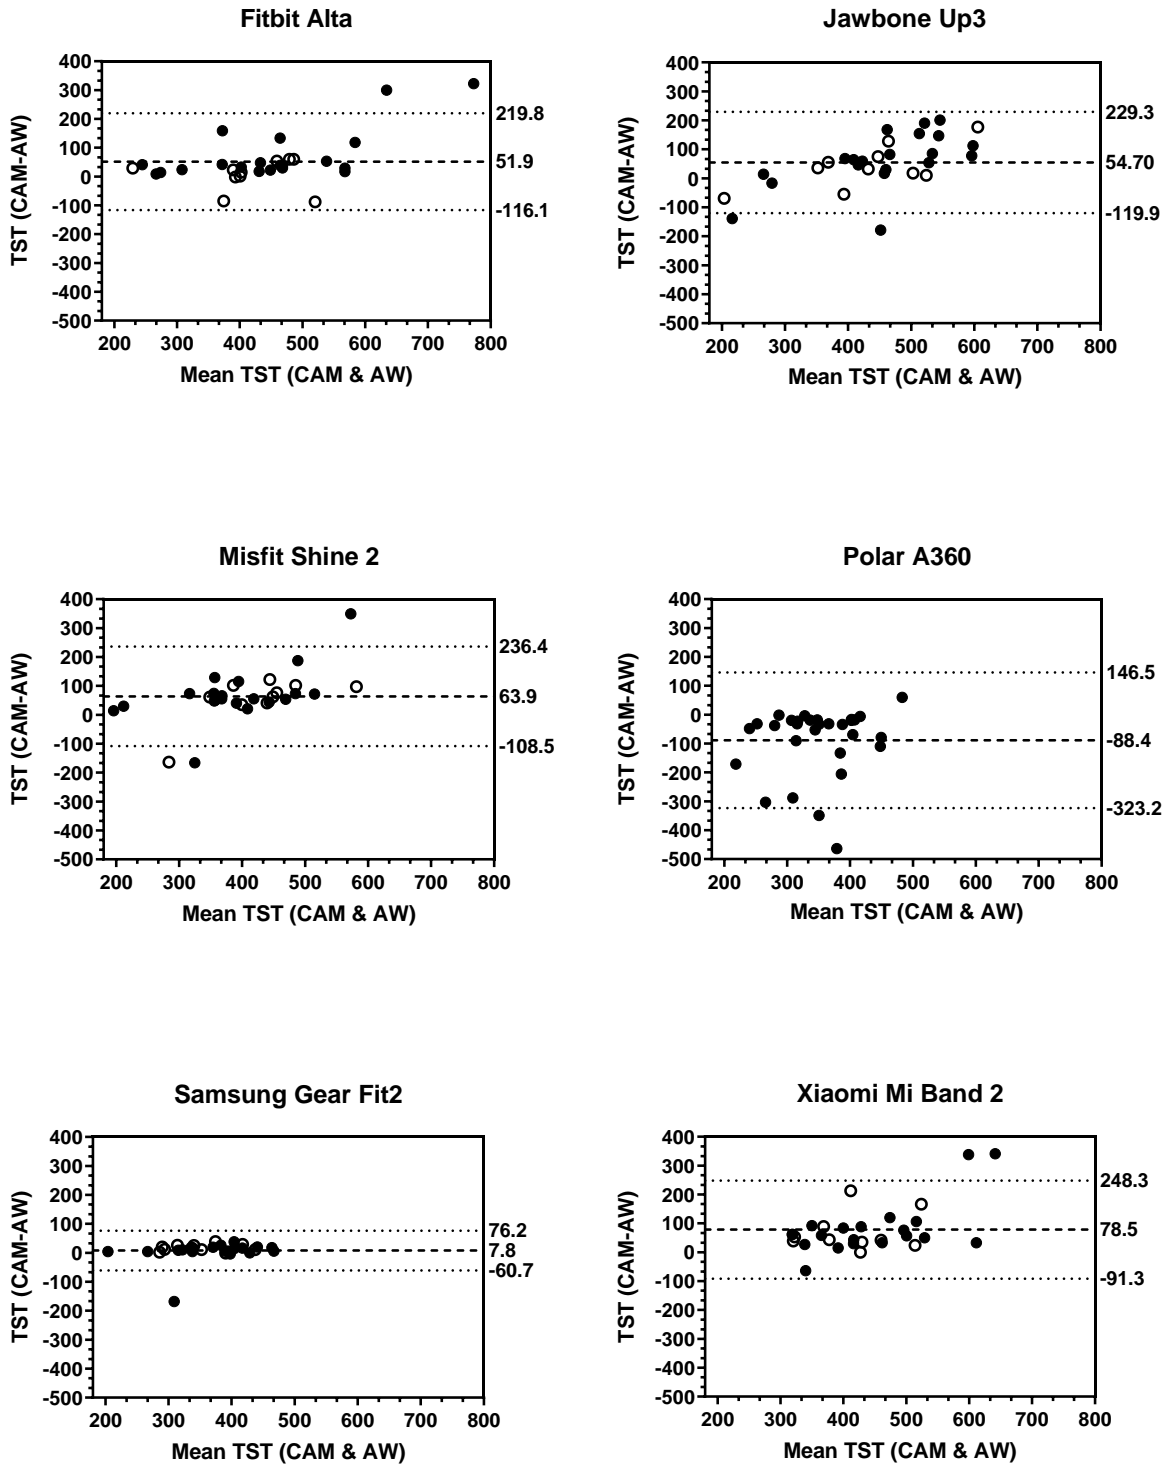

**Supplemental Figure 3.** Bland-Altman plots for unedited commercial activity monitor vs. unedited Actiwatch wake after sleep onset.

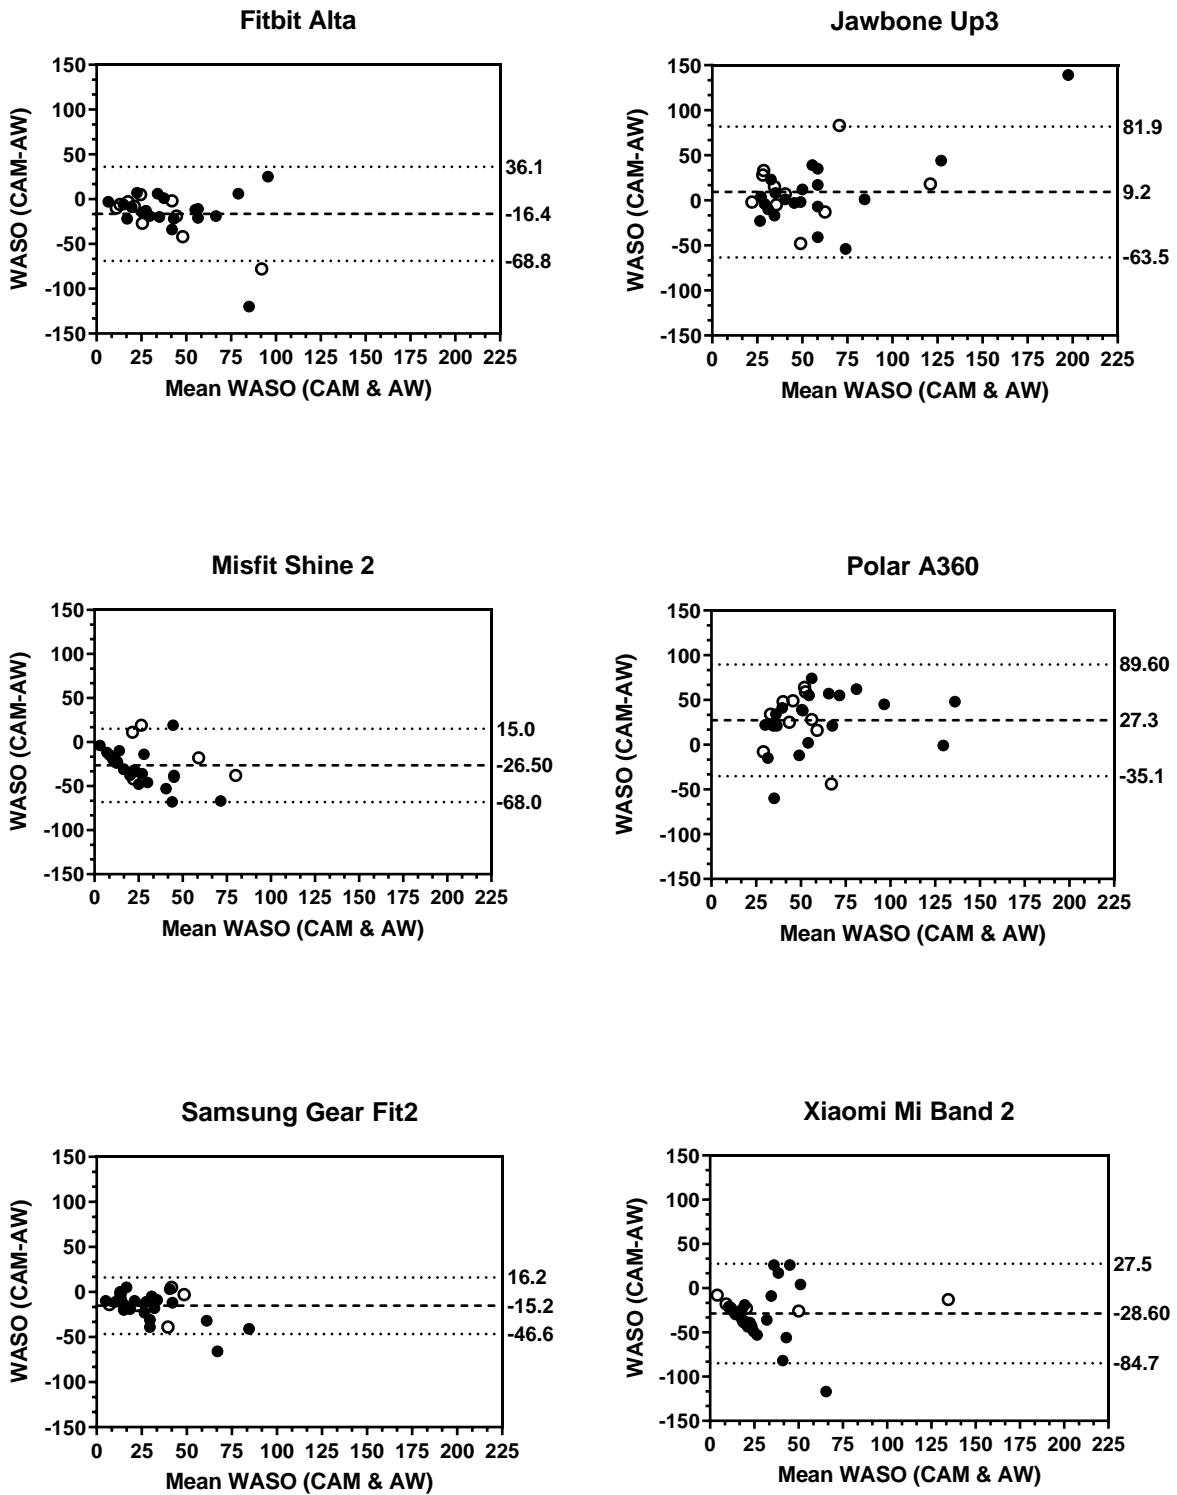

Supplement: NIHMS1536183-supplement-1.pdf [file NIHMS1536183-supplement-1.pdf]
